# Supplementary material for: High-efficiency deep-red quantum-dot light-emitting diodes with type-II CdSe/CdTe core/shell quantum dots as emissive layers
Source: Royal Society of Chemistry journal article supplement (doi:10.1039/c6tc01531j), 2016-01-01
Supplement: c6tc01531j1.pdf [file c6tc01531j1.pdf]

## Supporting Information

# High-Efficiency Deep-Red Quantum-Dot Light-Emitting Diodes with Type-II CdTe/CdSe Core/Shell Quantum Dots as Emissive Layers

Qingli Lin,<sup>a,b</sup> Bin Song,<sup>b</sup> Hongzhe Wang,<sup>\*b</sup> Fengjuan Zhang,<sup>b</sup> Fei Chen,<sup>b</sup> Lei Wang,<sup>b</sup> Lin Song Li,<sup>b</sup> Fang Guo,<sup>\*a</sup> and Huaibin Shen<sup>\*b</sup>

<sup>a</sup>College of Chemistry, Liaoning University, Shenyang 110036, China

<sup>b</sup>Key Laboratory for Special Functional Materials of Ministry of Education, Henan University, Kaifeng 475004, China

\*E-mail: whz@henu.edu.cn, fguo@lnu.edu.cn, shenhuaibin@henu.edu.cn.

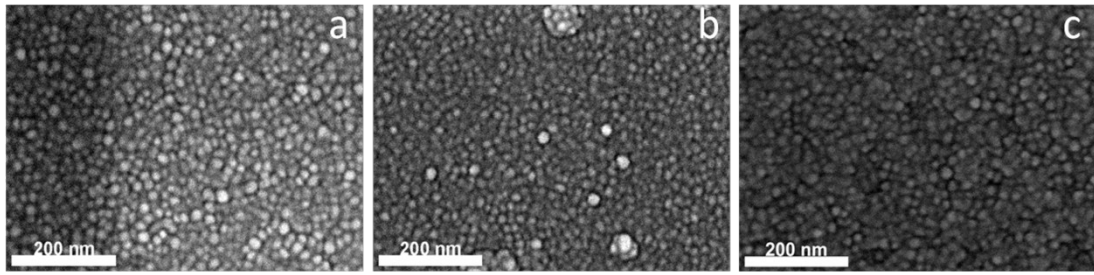

**Figure S1.** SEM images of QD layers with emission wavelength of 642 nm (a), 664 nm (b) and 689 nm (c).

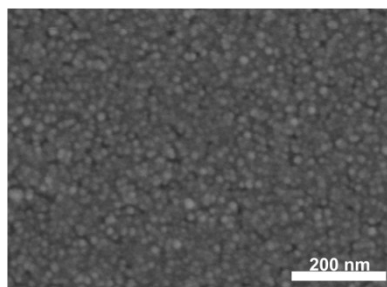

**Figure S2.** SEM image of ZnO layers.

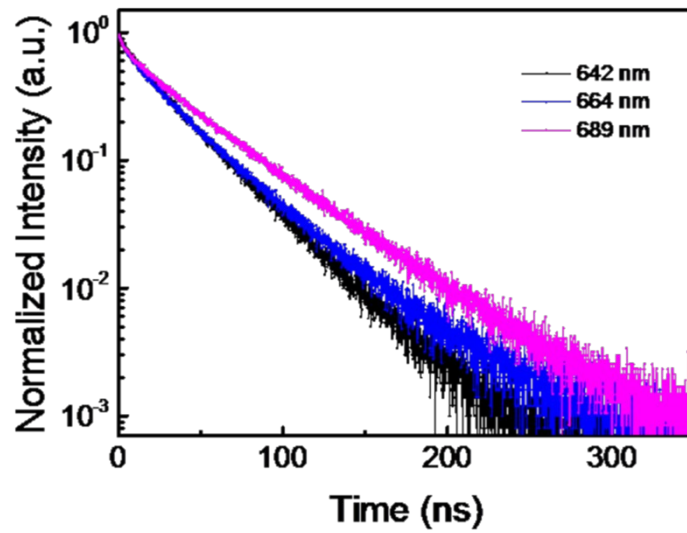

**Figure S3.** Transit-PL lifetime of QDs with different thickness of shells.  $\tau$  (642 nm, black) = 31.48 ns,  $\tau$  (664nm, blue) = 35.39 ns,  $\tau$  (689 nm, magenta) = 43.78 ns.

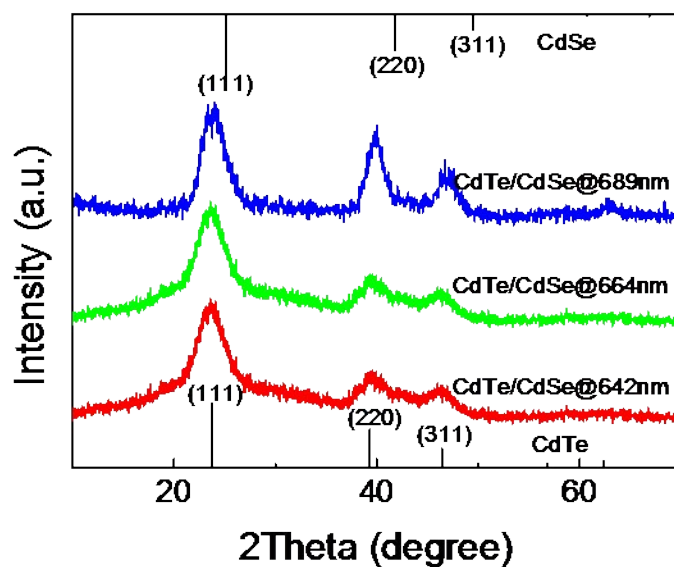

Figure S4. XRD patterns of as-prepared CdTe/CdSe QDs with different PL peaks.

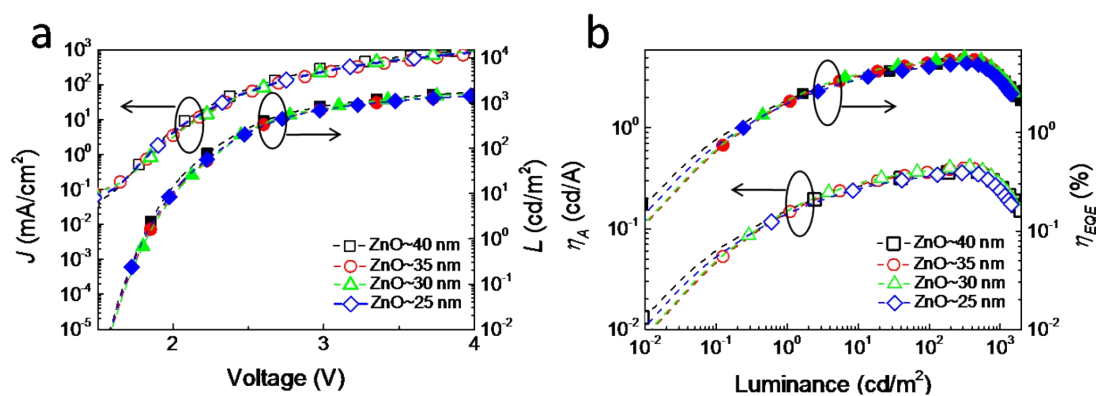

Figure S5. Characteristics of QD-LEDs with different thickness of ZnO electron transport layer. (a) Current density-voltage-luminance ( $J$ - $V$ - $L$ ), (b) Current efficiency-luminance-EQE

( $\eta_A$ - $L$ - $\eta_{EQE}$ )

**Table S1.** Summary of parameters of QD-LEDs with different thicknesses of QD and ZnO layers.

|                  |     | $V_T$ (V) | $L@4\text{ V}$ (cd/m <sup>2</sup> ) | $\eta_{EQE}$ (%) | $\eta_A$ (cd/A) |
|------------------|-----|-----------|-------------------------------------|------------------|-----------------|
| Thickness of QDs | ~35 | 1.9       | 1360                                | 4.6              | 0.33            |
|                  | ~30 | 1.8       | 1489                                | 5.0              | 0.38            |
|                  | ~25 | 1.8       | 1610                                | 5.4              | 0.38            |
|                  | ~20 | 1.8       | 1464                                | 3.1              | 0.32            |
| Thickness of ZnO | ~40 | 1.8       | 1716                                | 5.26             | 0.37            |
|                  | ~35 | 1.8       | 1441                                | 5.6              | 0.40            |
|                  | ~30 | 1.8       | 1619                                | 5.8              | 0.41            |
|                  | ~25 | 1.8       | 1443                                | 5.0              | 0.36            |

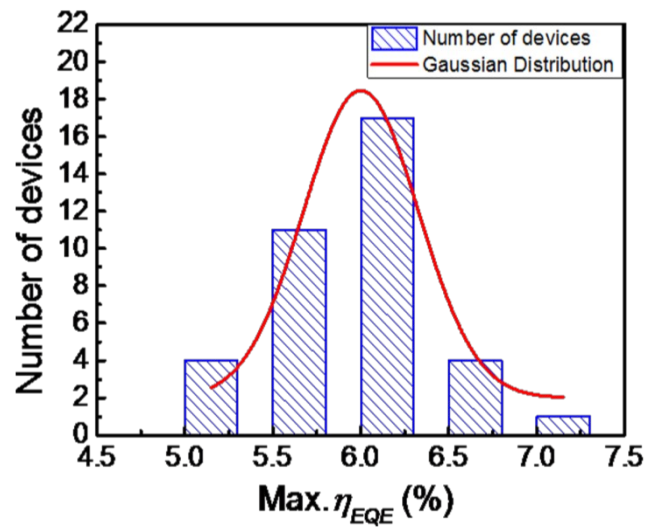

**Figure S6.** Histogram distribution of the maximum EQE values for devices with the same device structure as device #3.

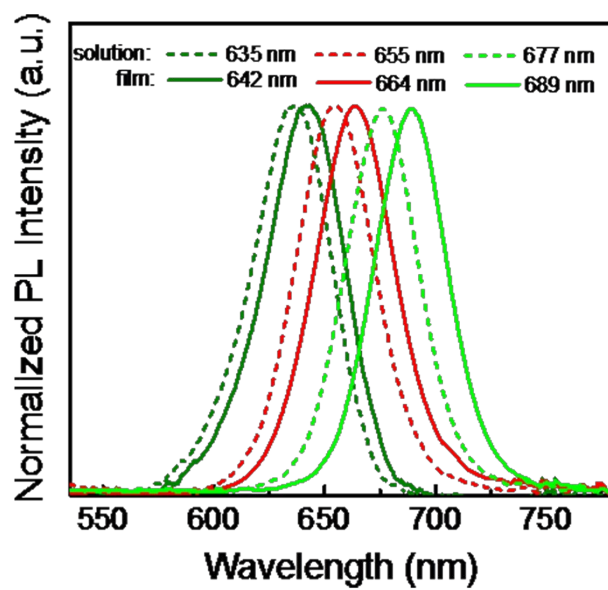

**Figure S7.** Comparison of PL spectra of QDs in the form of solution (dash line, at OD=0.02-0.05) versus solid films (solid line).
